# Supplementary material for: Al2O3 surface coating on LiCoO2 through a facile and scalable wet-chemical method towards high-energy cathode materials withstanding high cutoff voltages
Source: Royal Society of Chemistry journal article supplement (doi:10.1039/c7ta07312g), 2017-01-01
Supplement: c7ta07312g1.pdf [file c7ta07312g1.pdf]

## Supporting Information:

### **Al<sub>2</sub>O<sub>3</sub> surface coating on LiCoO<sub>2</sub> through a facile and scalable wet-chemical method towards high-energy cathode materials withstanding high cutoff voltages**

Aijun Zhou<sup>a</sup>, Qin Liu<sup>a</sup>, Yi Wang<sup>b</sup>, Weihang Wang<sup>a</sup>, Xu Yao<sup>a</sup>, Wentao Hu<sup>c</sup>, Long Zhang<sup>c</sup>, Xiqian Yu<sup>b,\*</sup>, Jingze Li<sup>a,\*</sup>, Hong Li<sup>b</sup>

<sup>a</sup>State Key Laboratory of Electronic Thin films and Integrated Devices, School of Microelectronics and Solid-State Electronics, University of Electronic Science and Technology of China, Chengdu 610054, China. E-mail: lijingze@uestc.edu.cn (J. Z. Li); Tel.: +86-28-83207620; Fax: +86-28-83202569.

<sup>b</sup>Beijing National Laboratory for Condensed Matter Physics, Institute of Physics, Chinese Academy of Sciences, Beijing 100190, China. E-mail: xyu@iphy.ac.cn (X. Yu); Tel.: +86-10-82649413; Fax: +86-10-82649046.

<sup>c</sup>State Key Laboratory of Metastable Materials Science and Technology, Yanshan University, Qinhuangdao 066004, China.

\*Corresponding authors.

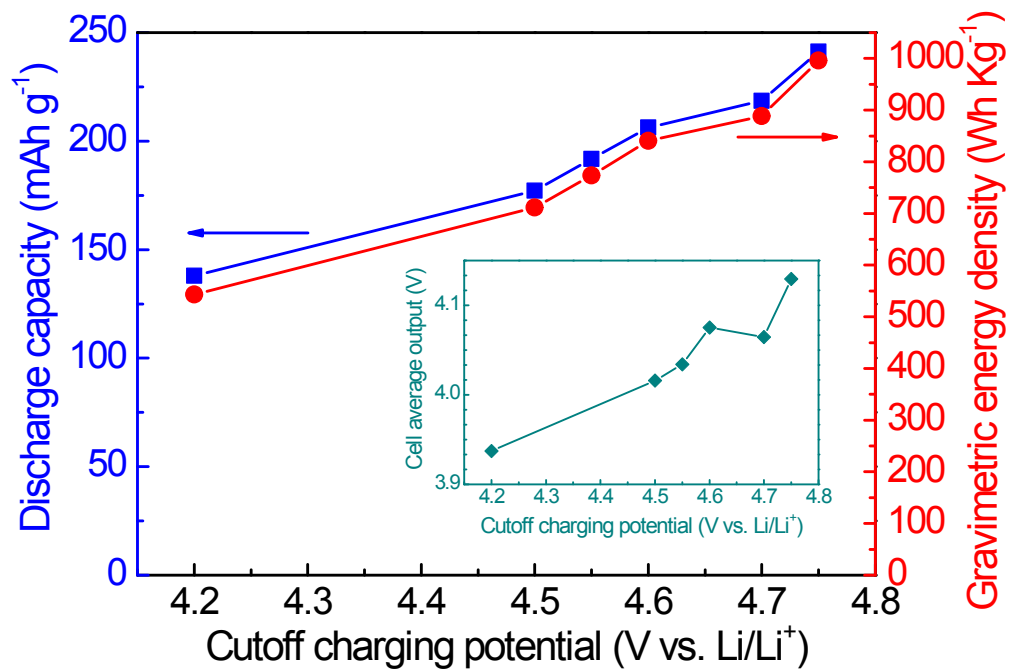

**Fig. S1.** Maximum specific capacity and gravimetric energy density of as-received commercial LiCoO<sub>2</sub> as a function of the cutoff charging potential cycled at 1 C. The inset shows the the dependence of the cell's average output voltage which is calculated by dividing the energy density by the discharge capacity.

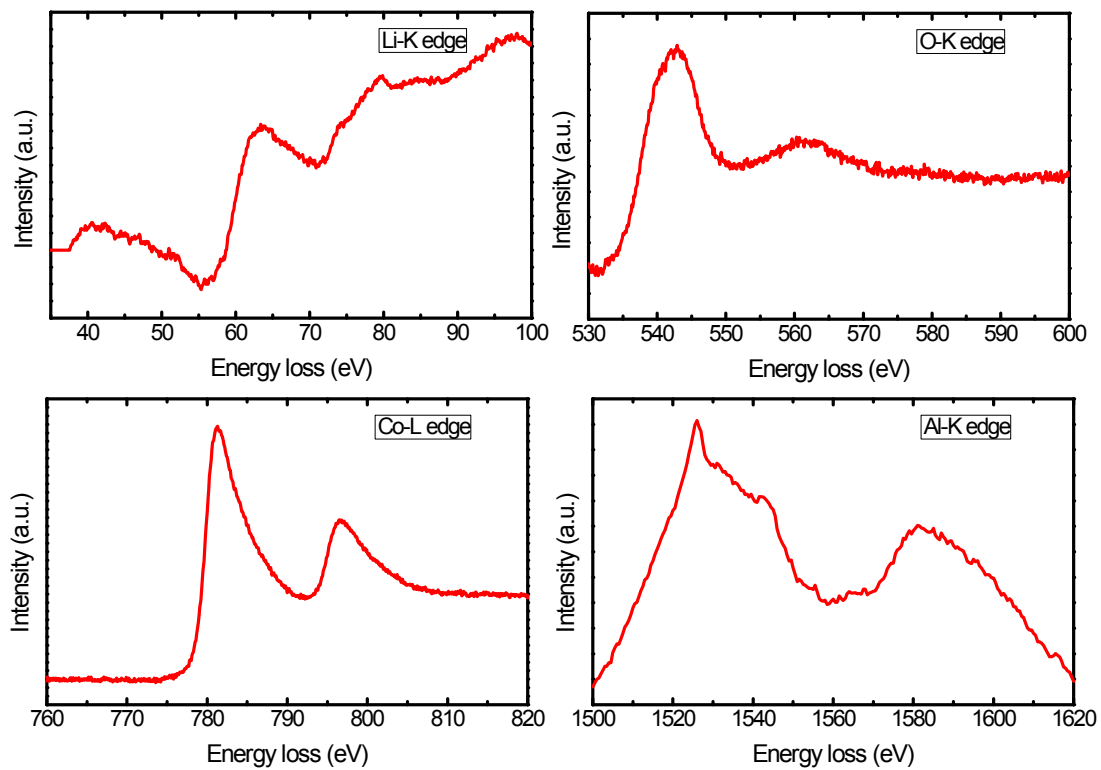

**Fig. S2.** EELS spectra of Li, O, Co and Al elements in the surface coating part of the AOLCO powders.

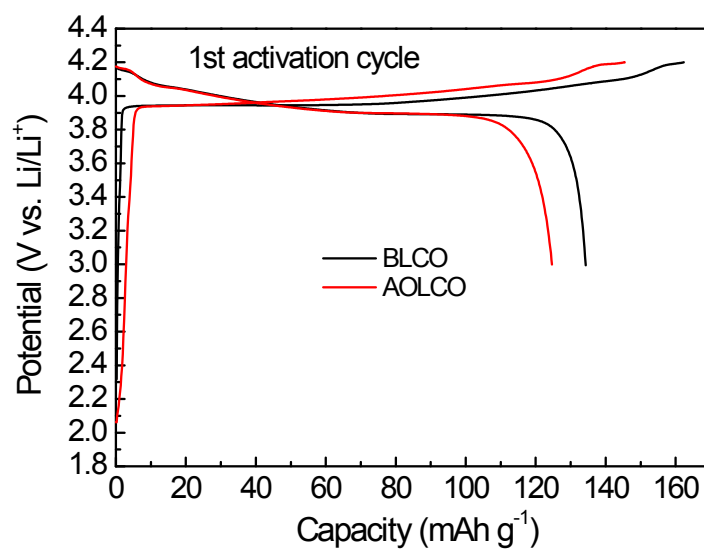

**Fig. S3.** Charge-discharge curves of BLCO and AOLCO during the 1<sup>st</sup> activation cycle within 3.0–4.2 V.

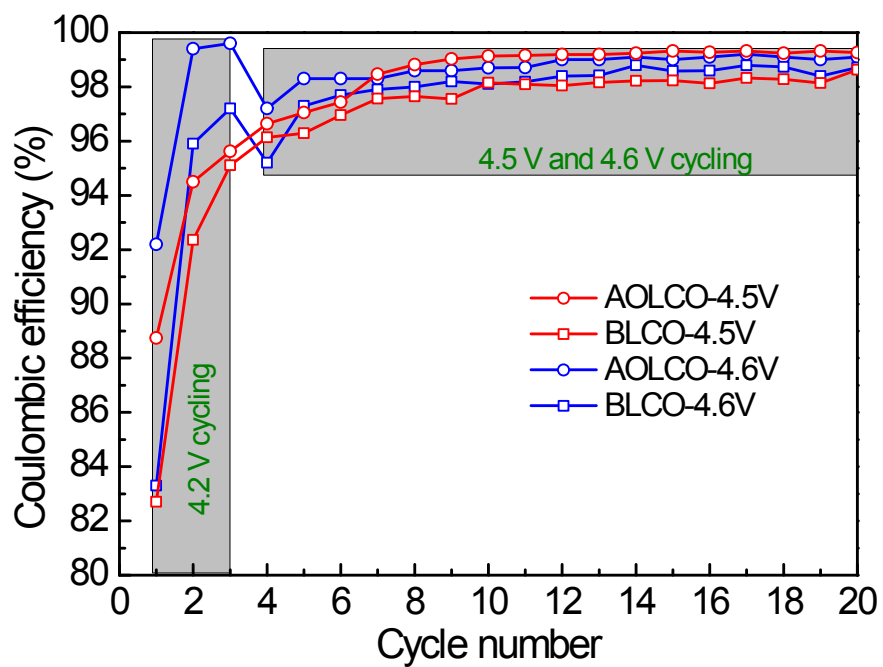

**Fig. S4.** Coulombic efficiency of BLCO and AOLCO electrodes during the first 20 cycles. The first 3 cycles were tested with 4.2 V cutoff voltage which is followed by cycling at higher voltages.

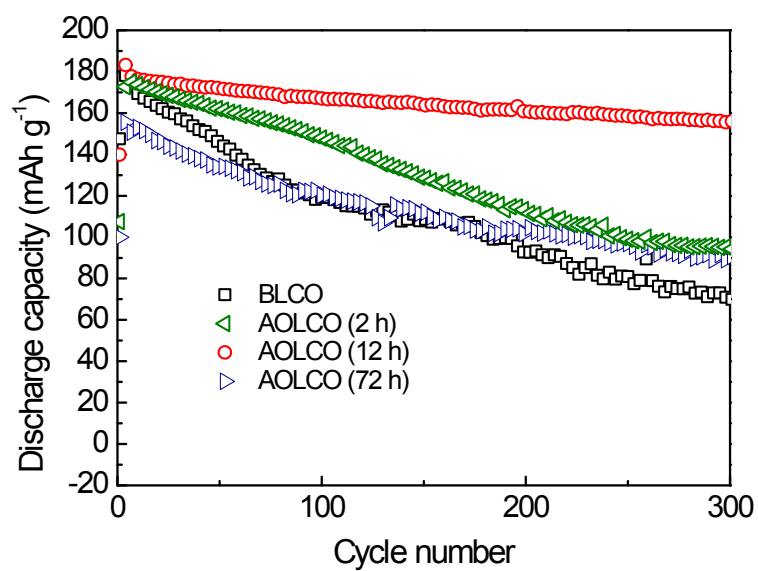

**Fig. S5.** Cycling stability of AOLCO electrodes with different coating time (stirring time in the solution) at 4.5 V cutoff, with current density of 1 C.

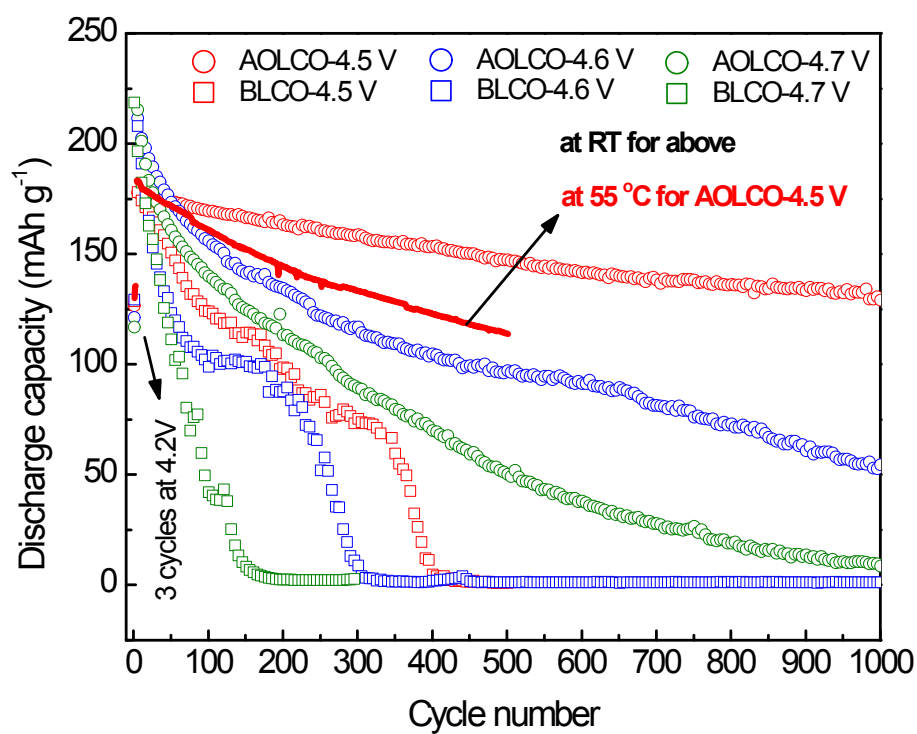

**Fig. S6.** Long-term cycling stability of BLCO and AOLCO electrodes at different cutoff voltages and temperatures. The current density is 1 C for all.

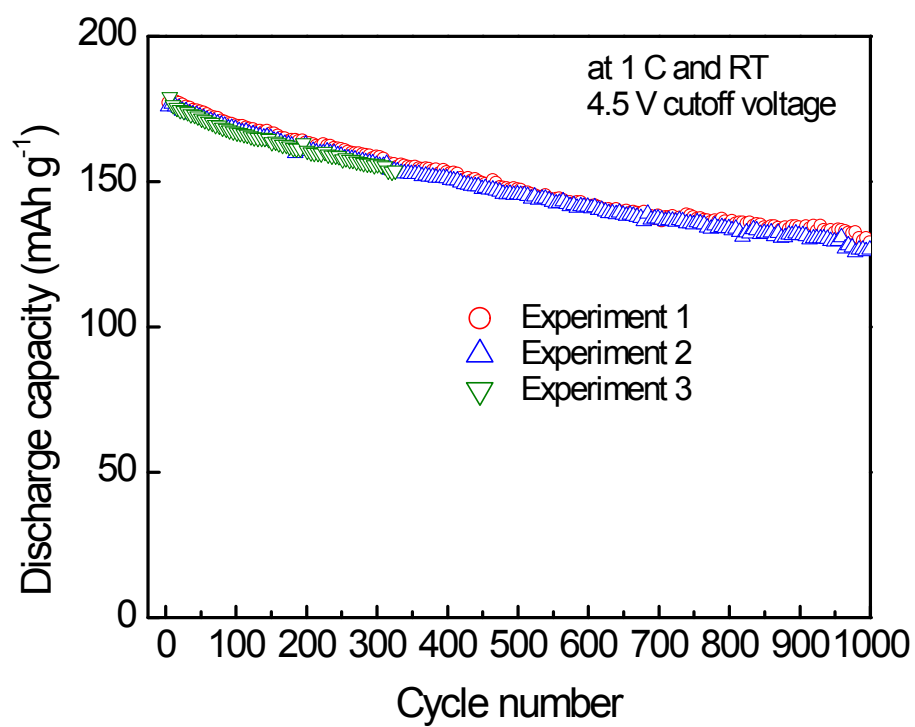

**Fig. S7.** Cycling performances of AOLCO electrodes prepared from three duplicated and independent experiments.

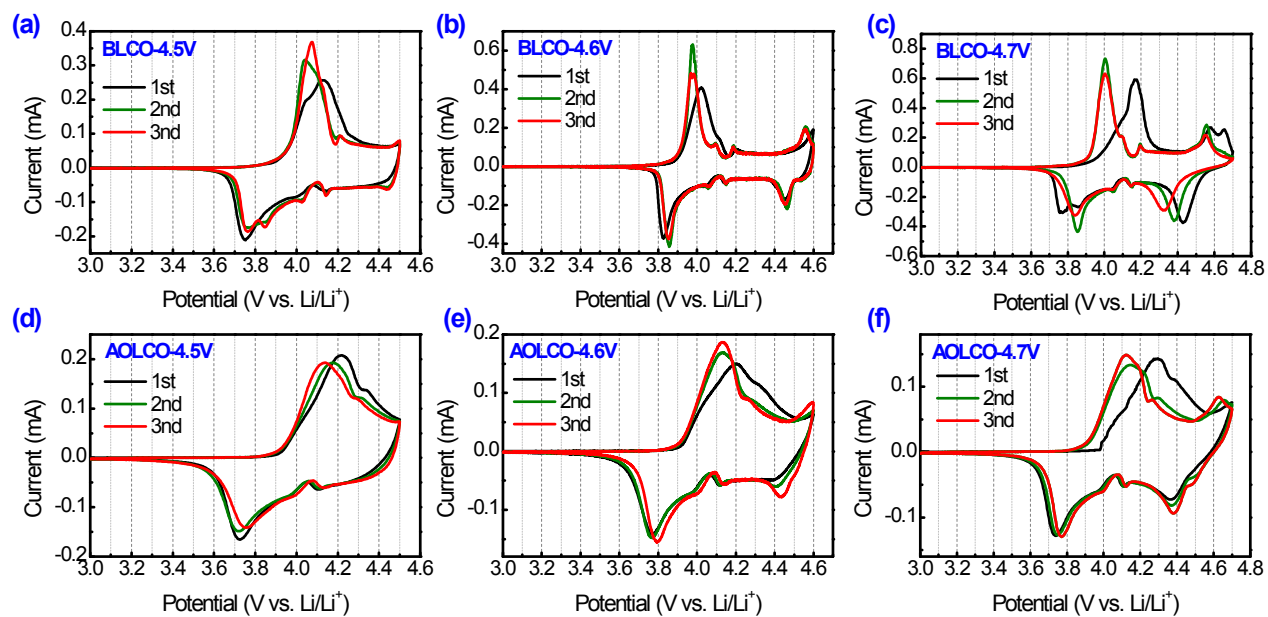

**Fig. S8.** CV profiles of the BLCO and AOLCO at different cutoff voltages during the first three cycles.

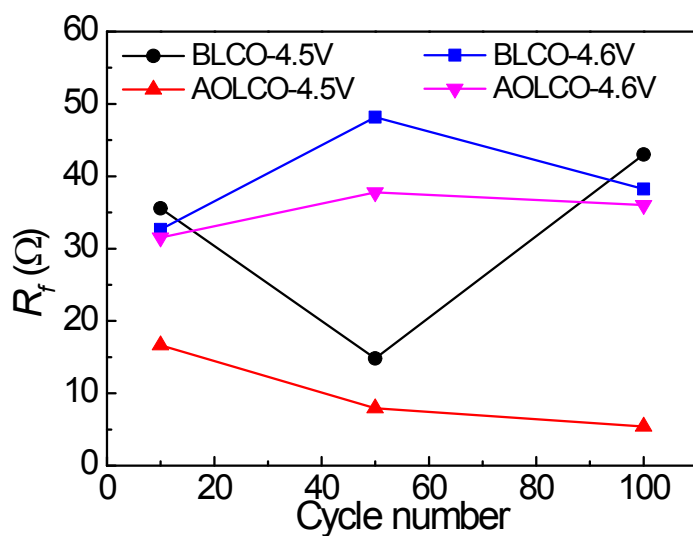

**Fig. S9.** Fitted surface layer resistance ( $R_f$ ) of BLCO and AOLCO after different number of cycles at 4.5 V and 4.6 V.

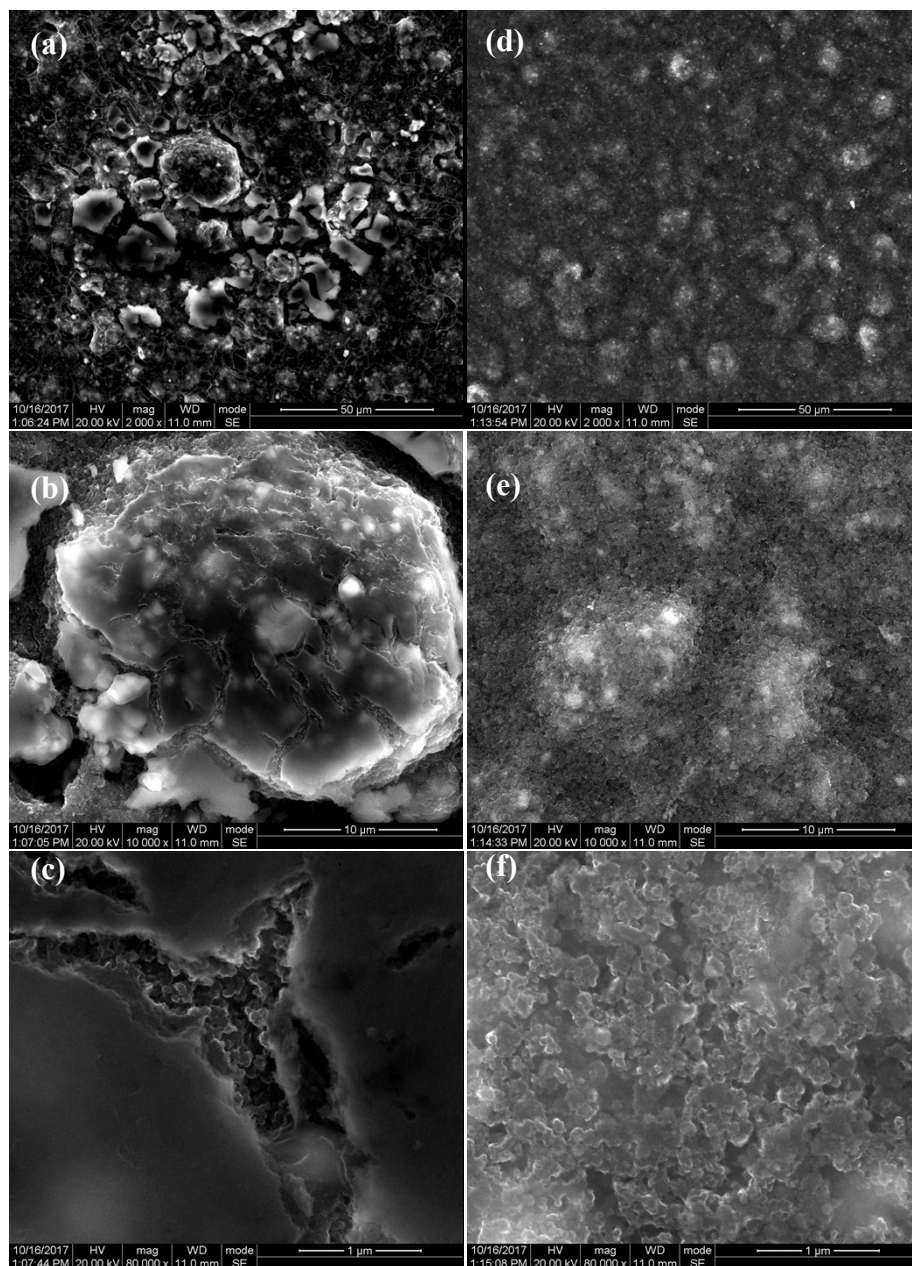

**Fig. S10.** FESEM images of bare LCO (a-c) and AOLCO (d-f) after cycling at 4.5 V for 500 cycles.

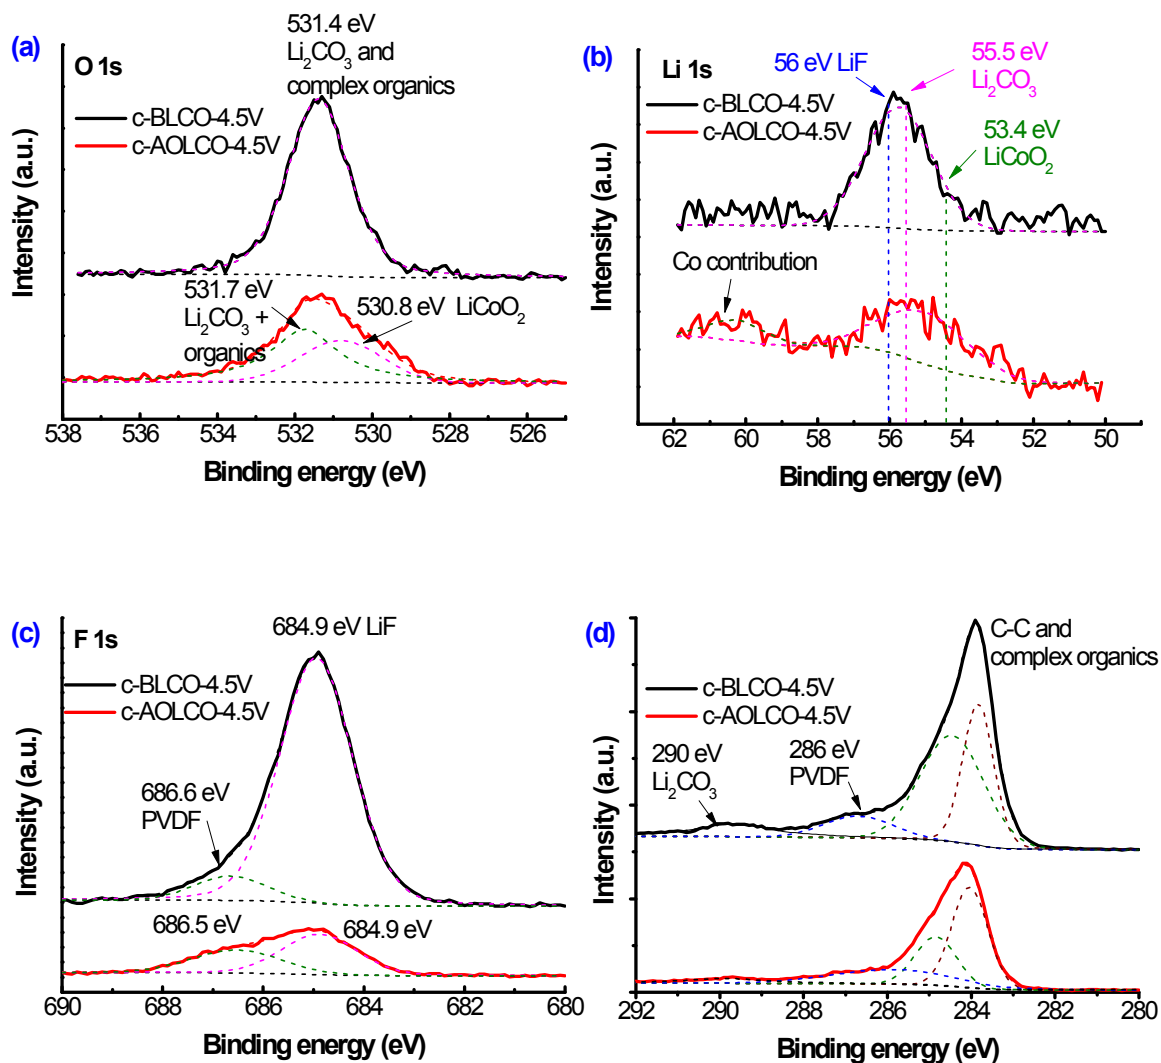

**Fig. S11.** XPS spectra analysis of the bare and coated electrodes cycled at 4.5 V cutoff for 500 cycles. (a) O 1s spectra, (b) Li 1s spectra and (c) F 1s spectra. All spectra were collected after 120 s of plasma etching.

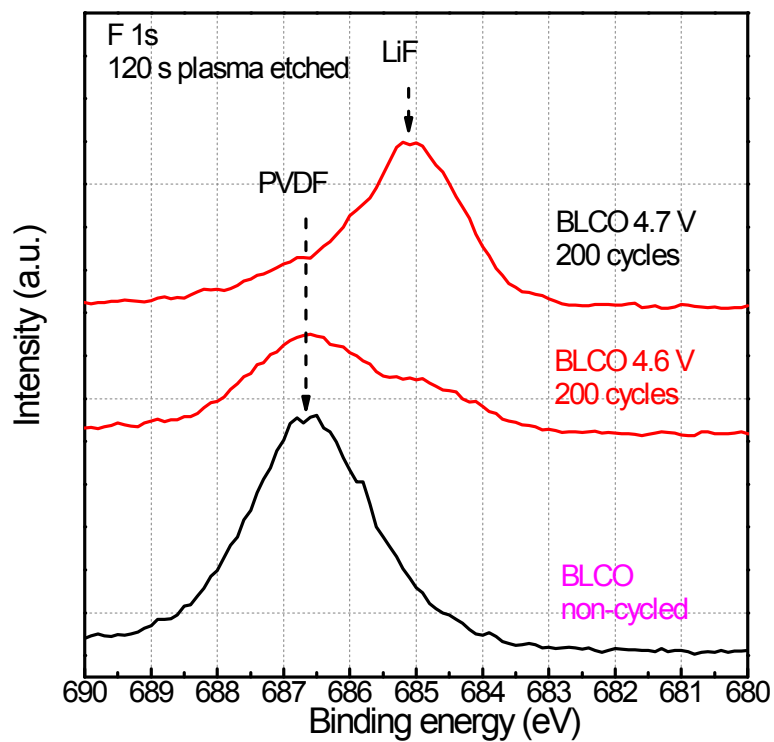

**Fig. S12.** Comparison of the F 1s spectra of BLCO before cycling and after 200 cycles at different cutoff voltages. All spectra were collected after 120 s of plasma etching.
